# Receptor Activated $\text{Ca}^{2+}$ Release Is Inhibited by Boric Acid in Prostate Cancer Cells

Kimberly Henderson<sup>1</sup>, Salvatore L. Stella, Jr.<sup>2</sup>, Sarah Kobylewski<sup>1</sup>, Curtis D. Eckhart<sup>1,3\*</sup>

**1** Molecular Toxicology, School of Public Health, University of California Los Angeles, Los Angeles, California, United States of America, **2** Neurobiology, Geffen School of Medicine, University of California Los Angeles, Los Angeles, California, United States of America, **3** Environmental Health Sciences, School of Public Health, University of California Los Angeles, Los Angeles, California, United States of America

## Abstract

**Background:** The global disparity in cancer incidence remains a major public health problem. We focused on prostate cancer since microscopic disease in men is common, but the incidence of clinical disease varies more than 100 fold worldwide.  $\text{Ca}^{2+}$  signaling is a central regulator of cell proliferation, but has received little attention in cancer prevention. We and others have reported a strong dose-dependent reduction in the incidence of prostate and lung cancer within populations exposed to boron (B) in drinking water and food; and in tumor and cell proliferation in animal and cell culture models.

**Methods/Principal Findings:** We examined the impact of B on  $\text{Ca}^{2+}$  stores using cancer and non-cancer human prostate cell lines,  $\text{Ca}^{2+}$  indicators Rhod-2 AM and Indo-1 AM and confocal microscopy. In DU-145 cells, inhibition of  $\text{Ca}^{2+}$  release was apparent following treatment with Ringers containing RyR agonists cADPR, 4CmC or caffeine and respective levels of BA (50  $\mu\text{M}$ ), (1, 10  $\mu\text{M}$ ) or (10, 20, 50, 150  $\mu\text{M}$ ). Less aggressive LNCaP cancer cells required 20  $\mu\text{M}$  BA and the non-tumor cell line PWR1E required 150  $\mu\text{M}$  BA to significantly inhibit caffeine stimulated  $\text{Ca}^{2+}$  release. BA (10  $\mu\text{M}$ ) and the RyR antagonist dantrolene (10  $\mu\text{M}$ ) were equivalent in their ability to inhibit ER  $\text{Ca}^{2+}$  loss. Flow cytometry and confocal microscopy analysis showed exposure of DU-145 cells to 50  $\mu\text{M}$  BA for 1 hr decreased stored  $[\text{Ca}^{2+}]$  by 32%.

**Conclusion/Significance:** We show B causes a dose dependent decrease of  $\text{Ca}^{2+}$  release from ryanodine receptor sensitive stores. This occurred at BA concentrations present in blood of geographically disparate populations. Our results suggest higher BA blood levels lower the risk of prostate cancer by reducing intracellular  $\text{Ca}^{2+}$  signals and storage.

**Citation:** Henderson K, Stella SL Jr, Kobylewski S, Eckhart CD (2009) Receptor Activated  $\text{Ca}^{2+}$  Release Is Inhibited by Boric Acid in Prostate Cancer Cells. PLoS ONE 4(6): e6009. doi:10.1371/journal.pone.0006009

**Editor:** Dong-Yan Jin, University of Hong Kong, Hong Kong

**Received:** November 17, 2008; **Accepted:** May 20, 2009; **Published:** June 23, 2009

**Copyright:** © 2009 Henderson et al. This is an open-access article distributed under the terms of the Creative Commons Attribution License, which permits unrestricted use, distribution, and reproduction in any medium, provided the original author and source are credited.

**Funding:** The work for this grant was funded by personal funds (CE) and in part by the University of California Toxic Substances Research and Training Program (TSR&TP) for partial support of KH and SK. CE is the doctoral mentor for KH and SK. TSR&TP funding was for student fellowships restricted to student support and had no role in study design, data collection and analysis, decision to publish, or preparation of the manuscript.

**Competing Interests:** The authors have declared that no competing interests exist.

\* E-mail: ceckhart@ucla.edu

## Introduction

One of the ways cells respond to environmental stimuli is by opening channels between sites of stored calcium, such as the endoplasmic reticulum (ER), Golgi, and mitochondria (mt), which contain high free  $\text{Ca}^{2+}$  concentrations (500  $\mu\text{M}$ ), and the cytoplasm, which contains low free  $\text{Ca}^{2+}$  concentrations (100 nM) [1]. A rapid rise in cytoplasmic  $\text{Ca}^{2+}$  can be achieved by capacitative calcium entry (CCE) involving release of stored  $\text{Ca}^{2+}$  by the ryanodine receptor (RyR) and the  $\text{IP}_3$  receptor ( $\text{IP}_3\text{R}$ ) into the cytoplasm followed by an influx of extracellular  $\text{Ca}^{2+}$ . CCE activates  $\text{Ca}^{2+}$  binding proteins that regulate numerous cell functions including gene transcription, cell proliferation, vesicle secretion, and apoptosis [2,3]. Cytoplasmic  $\text{Ca}^{2+}$  concentrations are returned to normal as  $\text{Ca}^{2+}$  is removed by transporters such as the  $\text{Na}^{2+}$ - $\text{Ca}^{2+}$  exchanger in the plasma membrane, the sarcoplasmic endoplasmic ATPase (SERCA) in the ER membrane,  $\text{Ca}^{2+}$  uniporter in mitochondria, and by binding to high affinity binding proteins [4,5]. In this report we present evidence that physiological levels of boric acid (BA) inhibit stored  $\text{Ca}^{2+}$  release from RyR agonist sensitive sites.

Boron (B) is the 9<sup>th</sup> most abundant element in seawater (425  $\mu\text{M}$  B) and until recently dismissed as biologically irrelevant [6]. B is bound to oxygen in nature and in physiological fluids 98.4% is present in the form of  $\text{B}(\text{OH})_3$  boric acid and 1.6% as  $\text{B}(\text{OH})_4^-$  borate. Biology has used this element in the structure of several molecules including: antibiotics in fungi [7]; quorum sensing auto inducer 2 in bacteria [8]; and the rhamnogalacturonan-II dimer in plants [9]. In plants, B is required for cell elongation, flowering and seed formation and is an integral component of food crops. Non-charged BA crosses the plasma membrane of root epidermal cells into the cytosol by passive diffusion and this is facilitated by NIP5; 1 transporters [10]. BA is partially converted to borate in the cytosol (pKa 9.6) and transported into the xylem using the export transporter BOR1 [11,12]. A human homolog of BOR1 named NaBC1 has been reported to be present in mammalian cell lines and to enhance cell proliferation at low BA concentrations [13], but this has yet to be confirmed by another laboratory. The effect of BA on growth and cell proliferation in trout, zebrafish and the mammalian HEK and HeLa cells follows an inverted U-shape with higher concentrations causing cell growth inhibition [13–15].

Concentrations of 60 to 100  $\mu\text{M}$  BA inhibit cell proliferation in prostate cancer cells whereas high concentrations of 500 to 1000  $\mu\text{M}$  BA are required to inhibit the proliferation of non-tumor prostate epithelial cells over the same time frame [16].

Human blood levels of BA reflect the local geology, water quality, and plants in the diet with a world-wide range from 2 to 120  $\mu\text{M}$  (21 to 1232 ng B/g wet blood) in free living healthy men and women [17,18]. Several human studies have observed a decrease in the risk of prostate and lung cancer, and abnormal cervical cytopathology in proportion to the amount of B ingested from food and water [19–22]. One study did not observe a protective effect, but differed from other studies in using a different B food database and estimated B content of some foods [23,24].

The biological plausibility for the chemopreventative effect of BA is supported by several lines of investigation. In immunocompromised mice, BA supplementation reduced the growth of transplanted human prostate tumors, decreased IGF-1 tissue concentrations, and lowered serum prostate specific antigen levels [25]. In cell culture, BA reduced the proliferation of human cancer prostate cell lines in a dose dependent manner and inhibited cell migration and invasion [16,26,27]. We discovered the relationship between BA's ability to inhibit prostate cancer cell proliferation and calcium signaling after mass spectrometry studies showed the affinity of BA for  $\text{NAD}^+$  was reduced by phosphorylation and therefore potentially subject to biological regulation [28,29]. BA was also shown to be a non-competitive inhibitor of ADP-ribosyl cyclase [30]. This led us to study its impact on the  $\text{NAD}^+/\text{cADPR}$   $\text{Ca}^{2+}$  release pathway. We showed that pharmacological levels of BA (250 and 1000  $\mu\text{M}$ ), but not methylboronic acid, decreased  $\text{NAD}^+$  stimulated release of  $\text{Ca}^{2+}$  without affecting calcium release when applied on its own [27]. It was not clear from these studies if BA was inhibiting  $\text{Ca}^{2+}$  release by interfering with  $\text{NAD}^+$  conversion to cADPR, blocking release of  $\text{Ca}^{2+}$  stores, or interfering with CCE. It also raised the possibility that BA concentrations in the normal blood range might be able to inhibit  $\text{Ca}^{2+}$  release from ryanodine receptor (RyR) sensitive stores. Here we demonstrate that physiological levels of BA inhibit  $\text{Ca}^{2+}$  release from RyR responsive stores in human prostate epithelial cells and lower luminal  $\text{Ca}^{2+}$  levels.

## Methods

### Cell Cultures

Experiments used prostate cancer cell lines DU-145 and LNCaP and the non-tumor cell line PWR1E. Cells were grown and maintained in cell culture plates at 37°C in 95% air and 5%  $\text{CO}_2$  humidified incubator. For confocal experiments, cells were cultured on glass cover slips for 24 hours prior to performing assays and studied at a confluency of less than 80%. DU-145 and PWR1E cells were acquired from American Type Culture Collection (ATCC, Manassas, VA) and LNCaP was a gift from Dr Allen Pantuck of the Department of Urology, Geffen School of Medicine at the University of California, Los Angeles. RPMI cell culture media was supplemented with 10% fetal bovine serum (FBS), penicillin (100 U/ml), streptomycin (100  $\mu\text{g}/\text{ml}$ ), and L-glutamine (200 mM). PWR1E non-tumor cells were maintained in Keratinocyte media containing streptomycin (100  $\mu\text{g}/\text{ml}$ ), L-glutamine (200 mM), 2.5  $\mu\text{g}$  human recombinant EGF, and 25 mg of bovine pituitary extract (Gibco, Carlsbad, CA). Boron depleted media was prepared using the boron specific ionic exchange resin, Amberlite IRE-743 (Sigma) as previously described [16] and modified as follows. Nine grams of autoclaved IRA-743 ion exchange resin were added to 500 ml media and

mixed on an Orbit rotator at 75 to 100 rpm for 15 to 20 hrs at 9°C.

### Measurement of $\text{Ca}^{2+}$ Transients

Storage  $\text{Ca}^{2+}$  changes were monitored using the calcium sensitive dye Rhod-2, AM ester (Biotium, Hayward, CA) which accumulates in organelles. Rhod-2, AM ester has a  $K_d$  of 1 mM and has been shown to compartmentalize, particularly in the mitochondria, but as we show, in other organelles as well (Fig. 1). We also used ER Tracker green and Mito Tracker green (Molecular Probes, Carlsbad, CA) in conjunction with Rhod-2, Am ester. They are highly specific fluorescent labels for the endoplasmic reticulum and mitochondria, respectively. We analyzed  $\text{Ca}^{2+}$  changes in response to BA and various agonists by selecting regions of interest in cells that overlapped the red

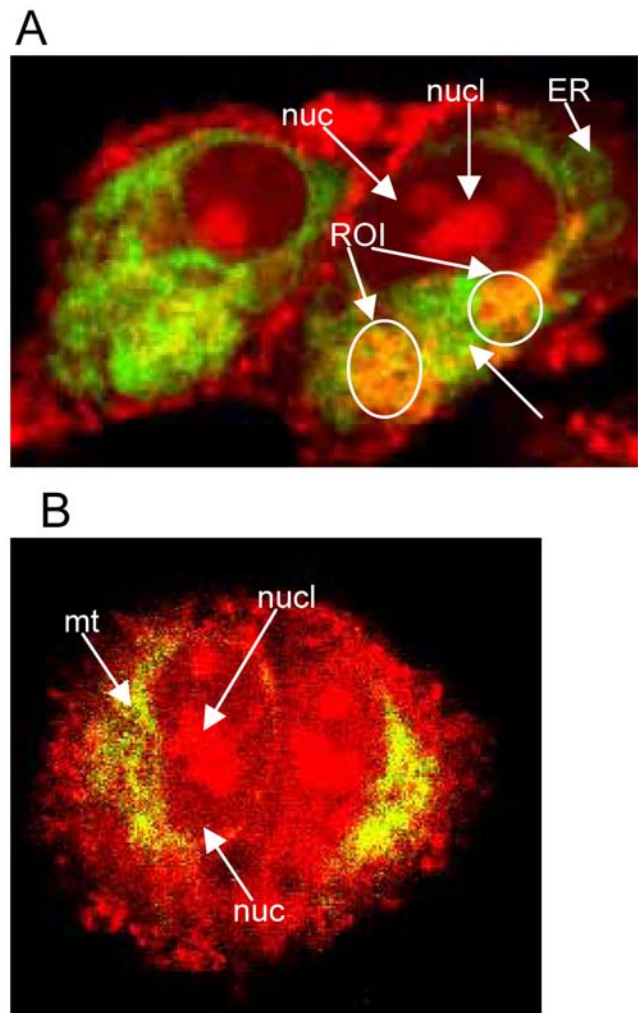

**Figure 1. DU-145 cells demonstrating fluorescently labeled stored calcium, ER and mitochondria.** A. Two DU-145 cells labeled with red fluorescent intracellular calcium fluorophore, Rhod-2, and green fluorescent endoplasmic reticulum label, ER tracker. Yellow indicates overlap of  $\text{Ca}^{2+}$  and ER and the circle is the region of interest (ROI) analyzed in these experiments. Arrows indicate organelles: nucl (nucleolus), nuc (nucleus), ER (endoplasmic reticulum) B. Two DU-145 cells labeled with red fluorescent intracellular  $\text{Ca}^{2+}$  fluorophore, Rhod-2, and green fluorescent mitochondrial label, Mito tracker. Yellow indicates overlap of calcium and mitochondria. Arrows indicate organelles: nucl (nucleolus), nuc (nucleus), mt (mitochondria). doi:10.1371/journal.pone.0006009.g001

Rhod-2  $\text{Ca}^{2+}$  label with the green ER tracker (Fig. 1A) [31–33]. Rhod-2, AM ester was prepared as a 1 mM stock solution in DMSO and diluted in either complete RPMI media or complete Keratinocyte media to 3  $\mu\text{M}$ . Cells were incubated with Rhod-2 AM ester (5  $\mu\text{M}$ ) and ER or Mt Tracker (0.5  $\mu\text{M}$ , 250 nM respectively) in RPMI or Keratinocyte media for 30 minutes at 37°C.  $\text{Ca}^{2+}$  release was stimulated using agonists in combination with different concentrations of BA in Ringers solution. Images were collected with a Zeiss 510 LSM 5 Pascal mounted to an upright microscope (Zeiss Axioplan 2) equipped with an Axoplan X63 (NA 0.95) water immersion objective. A HeNe laser was used to excite Rhod-2 at 543 nm. 488 nm from a laser diode was used to excite ER or Mt Tracker. The emission was collected on a photomultiplier tube through a 560 nm LP filter for Rhod-2 and a 505 LP filter for ER and Mito trackers. Additional magnification, time series, and background subtraction were controlled using Zeiss LSM acquisition software. All images were acquired as 12 bit.

### Analysis of $\text{Ca}^{2+}$ release using confocal microscopy

BA treatments were applied in  $\text{Ca}^{2+}$  free Ringer's solution prepared using ultrapure water to remove B [16,34].  $\text{Ca}^{2+}$  release from the RyR was activated by the addition of either 25  $\mu\text{M}$  cADPR to 10  $\mu\text{M}$  digitonin permeabilized cells, or 20 mM caffeine or 100  $\mu\text{M}$  4-chloro-m-cresol (4cmc) in intact cells [35,36]. Inhibition of  $\text{Ca}^{2+}$  release was achieved using 10  $\mu\text{M}$  dantrolene or varying concentrations of BA in the presence of an agonist [37]. SERCA was inhibited using 10  $\mu\text{M}$  cyclopiazonic acid (CPA) [2]. All drug applications were for a 30 second duration in calcium free Ringer's solution (143 mM NaCl, 5 mM KCl, 1 mM  $\text{MgCl}_2$ , 10 mM glucose, 10 mM HEPES, 1 mM EGTA- $2\text{H}_2\text{O}$ , 1 mM EGTA) in order to view  $\text{Ca}^{2+}$  release from the stores without input of external  $\text{Ca}^{2+}$ . Drug application was followed by a three minute wash in Ringer's solution containing calcium (140 mM NaCl, 5 mM KCl, 2 mM  $\text{CaCl}_2$ , 1 mM  $\text{MgCl}_2$ , 10 mM glucose, 10 mM HEPES). Solutions were delivered to the perfusion chamber at a rate of 1 ml/min by using a single-pass, gravity-feed perfusion system. Confocal images were taken every second and began 2 minutes prior to the first treatment application in order to establish a base line of fluorescence intensity. The change in fluorescence intensity (f) caused by the drug application was compared to an averaged baseline measurement which consisted of three measurements prior to the application of the drug ( $f_0$ ). All measurements were normalized to the base line in this manner using the ratio  $f-f_0/f_0$ . Typically 6–10 cells were analyzed in one field of view and all experiments were performed on a minimum of three independent preparations. The order of drug application was based on an initial experiment involving consecutive agonist-only applications. If the 2<sup>nd</sup> application of agonist caused a lower  $\text{Ca}^{2+}$  release than the 1<sup>st</sup>, cells were treated with agonist plus BA first. This avoided the possibility that measured inhibition of  $\text{Ca}^{2+}$  release due to BA was in part due to refractory cells made so by prior treatment with agonist.

### Analysis of stored calcium levels

DU-145 prostate cancer cells were treated with BA for 1 to 72 hrs in media stripped of boron using Amberlite IRA-743 ion-exchange resin (Sigma-Aldrich, St. Louis, MO) as previously described. Just prior to analysis cells were removed from the plate using 1% trypsin digestion, centrifuged, and labeled for 45 minutes in standard media with 3  $\mu\text{M}$  Rhod-2 AM ester for storage  $\text{Ca}^{2+}$  analysis. In order to monitor cytoplasmic  $\text{Ca}^{2+}$  levels, cells were labeled with 5  $\mu\text{M}$  Indo-1 AM (Invitrogen, Carlsbad, CA) for 45

minutes. Labeled cells were then washed and resuspended in 1 mL of normal media. Fluorescence was analyzed using a Beckton Dickinson BD-LSR I analytic flow cytometer. Rhod-2 excitation was achieved with a 514 nm argon laser and analyzed in the (581 nm) FL-2 channel. Indo-1 was excited with a UV laser (351 nm) and analyzed on 400 nm (FL5) and 510 nm (FL4) band-pass filters. Results for Indo-1 labeled cells are given as ratios of fluorescence (FL5/FL4). Forward and side scatter were used to gate out cellular fragments [38]. Raw flow cytometry data was analyzed using FLOWJO software (TreeStar Software, San Carlos, CA, USA). Results are presented as %  $\text{Ca}^{2+}$  levels compared to untreated cells. Storage  $\text{Ca}^{2+}$  levels were also analyzed in BA treated and non-treated cells by comparing  $\text{Ca}^{2+}$  storage emptying in response to 100  $\mu\text{M}$  thapsigargin using confocal microscopy [39].

### Statistical analysis of the data

Data are presented as mean  $\pm$  SD and were analyzed using Student's paired or unpaired t-test or one-way ANOVA for multiple comparisons with Dunnett's multiple comparison post-hoc test using Graphpad Prism 4.0. A p value < 0.05 was considered to be statistically significant. The equation for non-linear one site binding (hyperbola)  $Y = B_{\text{max}} * X / (K_d + X)$  was used to calculate  $K_d$  and  $B_{\text{max}}$  values using Graphpad software.

### Chemicals and supplies

B was removed from water and media using methods previously described [13]. Caffeine, 4-CmC, ATP, CPA, dantrolene, thapsigargin, cADPR, digitonin and boric acid were obtained from Sigma (St. Louis, MO) diluted in calcium free Ringer's Solution to ensure that if DMSO was present levels were no greater than 0.1%. All solutions were prepared fresh prior to perfusion. Superfusion with 0.1% DMSO in calcium free Ringer's solution did not affect ER  $\text{Ca}^{2+}$  levels or imaging responses.

### Results

The objective of the study was to determine if physiological concentrations of BA inhibit the release of  $\text{Ca}^{2+}$  from RyR sensitive stores in human prostate cancer and non-tumor epithelial cells. DU-145 cells were loaded with Rhod-2 and ER tracker or Mito tracker to determine if Rhod-2 compartmentalized in one or both compartments. It was not possible to delineate  $\text{Ca}^{2+}$  signaling from the ER versus mitochondria in live cells using confocal microscopy. Rhod-2 labeled  $\text{Ca}^{2+}$  in mitochondria, ER, nucleolus, and other areas in the cell (Fig. 1A–B). In our experiments, a combination of ER Tracker and Rhod-2 were used to define our regions of interest on sites of stored  $\text{Ca}^{2+}$  (Fig. 1A). This area included  $\text{Ca}^{2+}$  stores located in the ER and mitochondria (Fig. 1A–B). Application of BA from 0.1–1000  $\mu\text{M}$  alone did not demonstrate an immediate measurable effect on storage  $\text{Ca}^{2+}$  using confocal microscopy (data not shown).

### Boric acid inhibits $\text{Ca}^{2+}$ release in response to ryanodine receptor agonists

To determine if BA inhibited  $\text{Ca}^{2+}$  release from the RyR, we treated DU145 cells with three different RyR agonists in combination with BA. Competitive ligand binding analysis showed BA was a single site reversible competitive inhibitor of cADPR, an endogenous agonist of RyR (Fig. 2A–C). The equilibrium dissociation constant, ( $K_D$ ) for cADPR was 15.10, but in the presence of BA increased to 49.39. Inhibition by BA was reversed by increasing the concentration of cADPR and the presence of BA

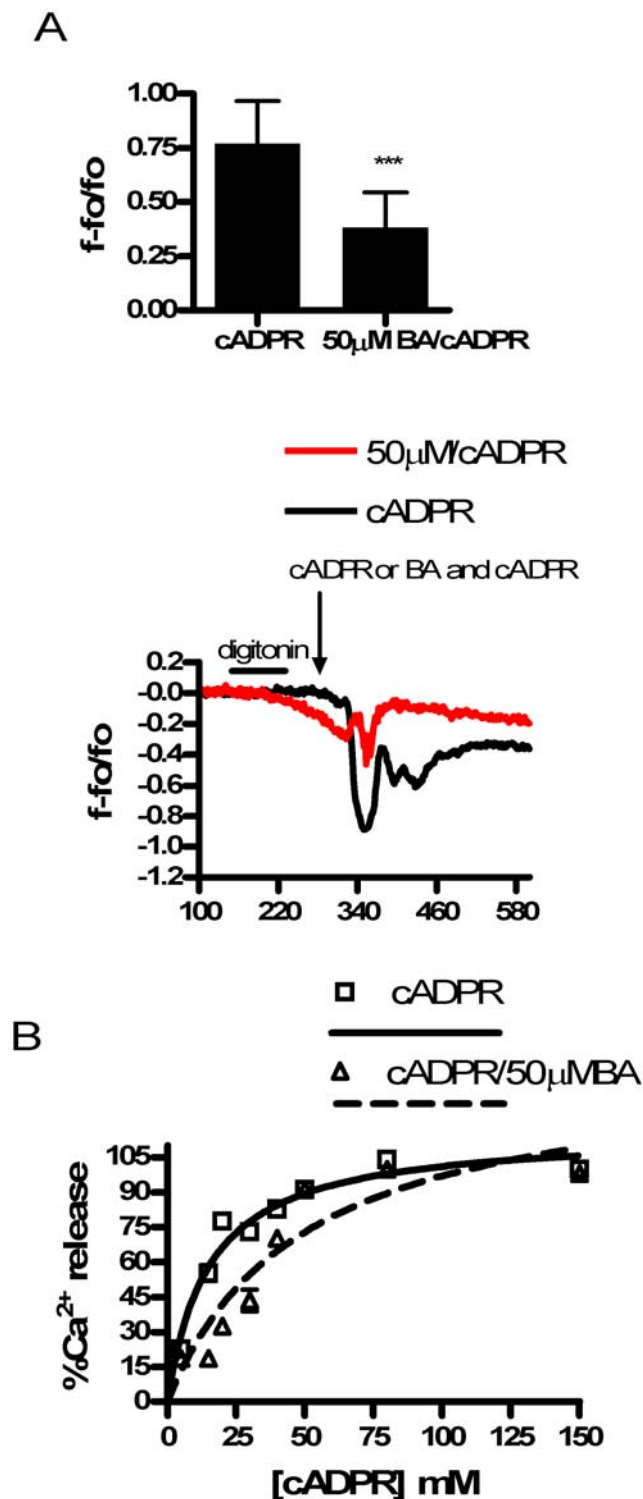

**Figure 2. Calcium release in permeabilized DU-145 cells in response to cADPR with and without 50 μM BA present.** A. 50 μM BA inhibited 25 μM cADPR induced Ca<sup>2+</sup> release (n=6; \*\*\*p<0.001). B. Competitive ligand binding study showed BA was a surmountable competitive antagonist of cADPR in a single site model. Concentrations of BA were held at 50 μM. At low cADPR concentrations BA shifted the Ca<sup>2+</sup> release response to the right, but this was reversed at higher cADPR concentrations and the maximum response (Bmax) was not changed. Each data point is the mean of n=6. R<sup>2</sup> is 0.9155 and 0.8606 for cADPR without and with BA, respectively. doi:10.1371/journal.pone.0006009.g002

**Table 1. Competitive Ligand Binding Study of cADPR and Boric Acid on Ryanodine Receptor Ca<sup>2+</sup> Release.**

| Best Fit Values         |                        |                |
|-------------------------|------------------------|----------------|
| Parameter               | cADPR                  | cADPR+BA       |
| Bmax                    | 116.4±3.5 <sup>a</sup> | 144.8±11.9     |
| K <sub>d</sub>          | 15.1±1.6               | 49.4±9.1       |
| 95% Confidence          |                        |                |
| Bmax                    | 109.3 to 123.4         | 120.8 to 168.8 |
| K <sub>d</sub>          | 11.9 to 18.3           | 31.0 to 67.8   |
| Goodness of Fit         |                        |                |
| Degrees of Freedom      | 41                     | 40             |
| R <sup>2</sup>          | 0.9155                 | 0.8606         |
| Absolute Sum of Squares | 2522                   | 6745           |

<sup>a</sup>Standard error of mean.

doi:10.1371/journal.pone.0006009.t001

did not change the maximum number of binding sites (Bmax) (Table 1).

We then analyzed the effect of BA on other RyR agonists in intact cells. We first used caffeine [20 mM] an agonist that potentiates RyR sensitivity to its native ligand, Ca<sup>2+</sup>. In response to two consecutive applications of caffeine, the second release was slightly greater than the first (Fig. 3A). This sequence was then repeated with BA added in combination with caffeine in the second application. The results of these experiments show that BA reduced Ca<sup>2+</sup> release in a dose dependent manner from 10 to 150 μM BA (Fig. 3B–F). We then examined the effect of BA on 4CmC, a direct agonist of the RyR. Consecutive applications of 50 μM 4CmC resulted in equivalent Ca<sup>2+</sup> release (Fig. 4A). As observed with caffeine, BA decreased 4CmC stimulated Ca<sup>2+</sup> release in a dose dependent manner (Fig. 4B–E). However, inhibition began at 1 μM BA and reached a maximum at 10 μM BA.

Previous studies have shown that the inhibitory effect of BA on cell proliferation at the IC<sub>50</sub> for DU-145 cells was approximately 10% less effective on the less aggressive LNCaP prostate cancer cell line. In addition, BA was not able to achieve a 50% reduction in proliferation in non-tumor PWR1E prostate epithelial cells in experiments using up to 4 times the IC<sub>50</sub> for DU145 [16]. We examined these cell lines to determine if BA was also less effective in inhibiting caffeine sensitive Ca<sup>2+</sup> release. Inhibition of Ca<sup>2+</sup> release in response to caffeine in LNCaP prostate tumor cells occurred over 20 μM–150 μM BA (Fig. 5A–D). Thus, LNCaP cells were less sensitive to BA compared to DU-145. LNCaP cells were not responsive to 4CmC treatment (not shown). The PWR1E non-tumor, hyperplastic prostate cell line required 150 μM BA to inhibit caffeine stimulated Ca<sup>2+</sup> release (Fig. 6A–D). PWR1E cells were non-responsive to 4CmC treatment (not shown).

### Boric acid inhibits cyclopiazonic acid induced Ca<sup>2+</sup> release from the ER

The release of ER Ca<sup>2+</sup> stores in some non-excitable cells can be stimulated using cyclopiazonic acid (CPA) which inhibits SERCA in a manner similar to thapsigargin, but can be washed out [40]. BA (0.1–1000 μM) by itself did not alter storage calcium levels during the time course of the experiment (not shown). Responses to consecutive applications of CPA [10 μM] did not decay (Fig. 7A). Simultaneous application of CPA and 1 μM BA caused a significant decrease in release and 10 μM BA caused near

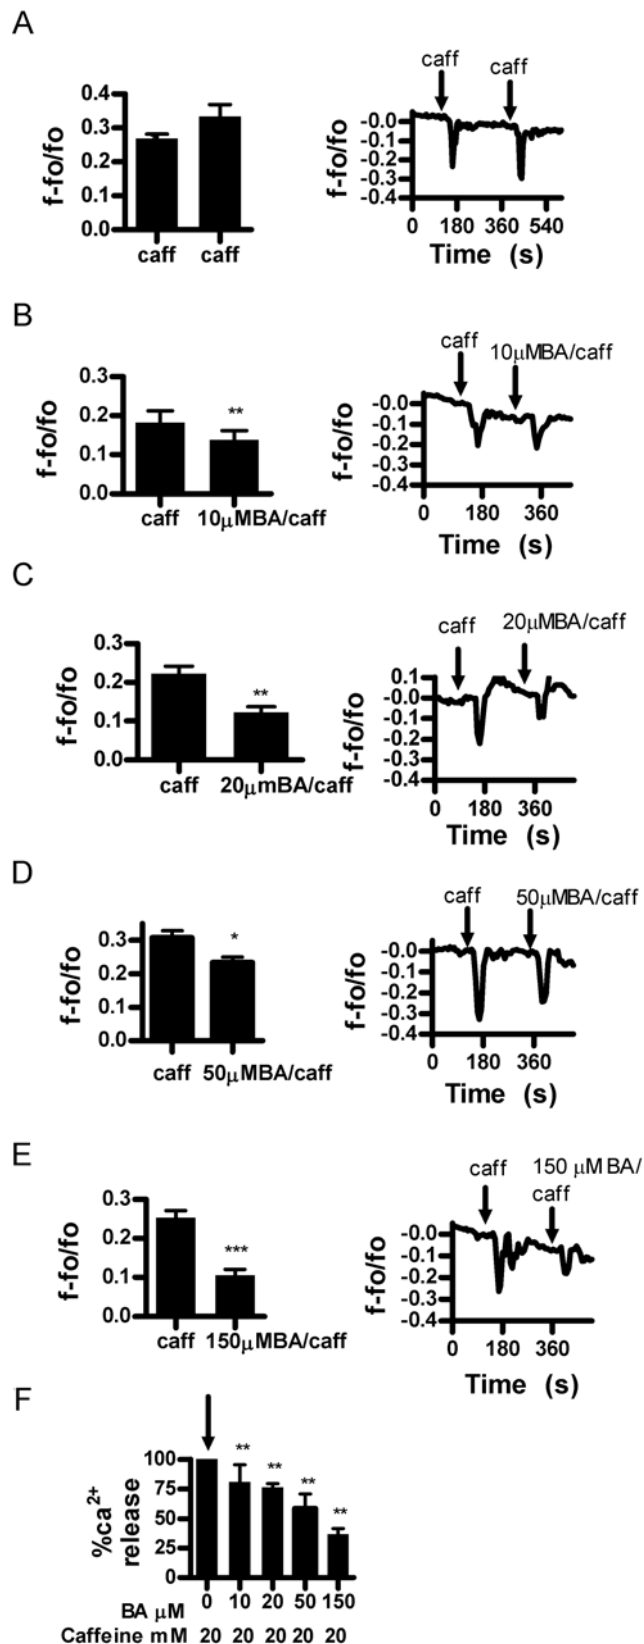

**Figure 3. Boric acid inhibits  $\text{Ca}^{2+}$  release in response to ryanodine receptor agonist caffeine in DU-145 cells.** A.  $\text{Ca}^{2+}$  release in DU-145 cells in response to consecutive applications of 20 mM caffeine ( $n=6$ ,  $*p=0.0168$ ). B. 10  $\mu$ M BA significantly inhibited  $\text{Ca}^{2+}$  release ( $n=6$ ,  $**p<0.01$ ). C. 20  $\mu$ M BA significantly inhibited

$\text{Ca}^{2+}$  release ( $n=6$ ,  $*p=0.0163$ ). D. 50  $\mu$ M BA significantly inhibited  $\text{Ca}^{2+}$  release ( $n=6$ ,  $**p=0.0042$ ). E. 150  $\mu$ M BA significantly inhibited  $\text{Ca}^{2+}$  release,  $n=6$ ,  $***p=0.0001$ . F. combined data analysis showing inhibitory dose response effect of BA on caffeine stimulated  $\text{Ca}^{2+}$  release, ( $n=6$  per concentration,  $**p<0.01$ ). Figures 2–9, each bar represents the mean response of 6 experiments ( $n=6$ ) replicated 3 times. The line scans on the right of each bar graph are representative responses from a single experiment.  
doi:10.1371/journal.pone.0006009.g003

complete inhibition (Fig. 7B–D). We then tested the effect of dantrolene, a known inhibitor of the RyR on  $\text{Ca}^{2+}$  release by CPA. We found that 10  $\mu$ M dantrolene inhibited CPA stimulated  $\text{Ca}^{2+}$  release at a level equivalent to 10  $\mu$ M BA (Fig. 8A–B).

### Boric acid treatment lowers storage $[\text{Ca}^{2+}]$ with no effect on cytoplasmic $[\text{Ca}^{2+}]$

Our results showing BA inhibited  $\text{Ca}^{2+}$  release lead us to analyze relative  $[\text{Ca}^{2+}]_{\text{st}}$  levels using Rhod-2 stained cells and relative  $[\text{Ca}^{2+}]_{\text{cyt}}$  levels using Indo-1 stained cells and flow cytometry. Exposure of DU-145 cells to BA [10–50  $\mu$ M] for 24 hours did not affect  $[\text{Ca}^{2+}]_{\text{cyt}}$  (Fig. 9A). However, reductions  $[\text{Ca}^{2+}]_{\text{st}}$  (22%) occurred with 10  $\mu$ M BA resulted in a 32% reduction in  $[\text{Ca}^{2+}]_{\text{st}}$  by 50  $\mu$ M BA at 1 hour (Fig. 9B). Neither higher BA concentrations nor treatment with 10  $\mu$ M BA up to 72 hours resulted in further reduction in  $[\text{Ca}^{2+}]_{\text{st}}$  (Fig. 9BC). We then conducted confocal measurements of thapsigargin stimulated  $\text{Ca}^{2+}$  release after DU-145 cells were pretreated with BA (50  $\mu$ M) for 24 hrs and observed a 35% decrease in  $\text{Ca}^{2+}$  release (Fig. 9D).

### Discussion

This study reports the unexpected finding that stored  $\text{Ca}^{2+}$  release and luminal levels can be modulated by physiologically relevant levels of BA in DU-145 prostate cancer epithelial cells. This is relevant to our understanding of cancer risk since blood levels of BA are determined by the consumption of B in drinking water and plant derived foods [17]. It is likely to be the first cellular response to B exposure and thus a starting point for understanding how the risk of prostate and lung cancer is reduced by B in a dose dependent manner [16,21,22]. BA exhibited the attributes of a classic antagonist in that it did not have an immediate effect on  $\text{Ca}^{2+}$  release when applied by itself and its effects were agonist dependent. BA dose dependently inhibited  $\text{Ca}^{2+}$  release in response to cADPR, an endogenous agonist of the RyR, and agonists caffeine and 4-CmC (Fig. 2–5). In our competitive ligand binding analysis, BA displayed the characteristic of a single site antagonist in that it was reversible at higher concentrations of cADPR (fig. 2B). BA increased  $K_d$ , from 15.1 to 49.4, but did not affect  $B_{\text{Max}}$  (Table 1). BA has been shown to bind to cADPR at high concentrations, however, BA's ability to inhibit cADPR, caffeine and 4CmC induced  $\text{Ca}^{2+}$  release indicates that at physiological concentrations BA may bind to the cADPR binding site on the RyR stabilizing the  $\text{Ca}^{2+}$  channel in its inactive state [30].

Proliferation of LNCaP cells have been reported to be about 10% less sensitive and PWR1E non-tumor cells are more than 4 fold less sensitive to BA than DU-145 cells [16]. We also observed this pattern of sensitivity in BA's ability to inhibit caffeine stimulated  $\text{Ca}^{2+}$  release. The lowest effective concentration for DU-145 was 10  $\mu$ M BA, LNCaP was 20  $\mu$ M BA, and PWR1E was 150  $\mu$ M BA (Fig. 3F, 5D & 6D). In addition to the decreased responsiveness to BA, both LNCaP and PWR1E were non-

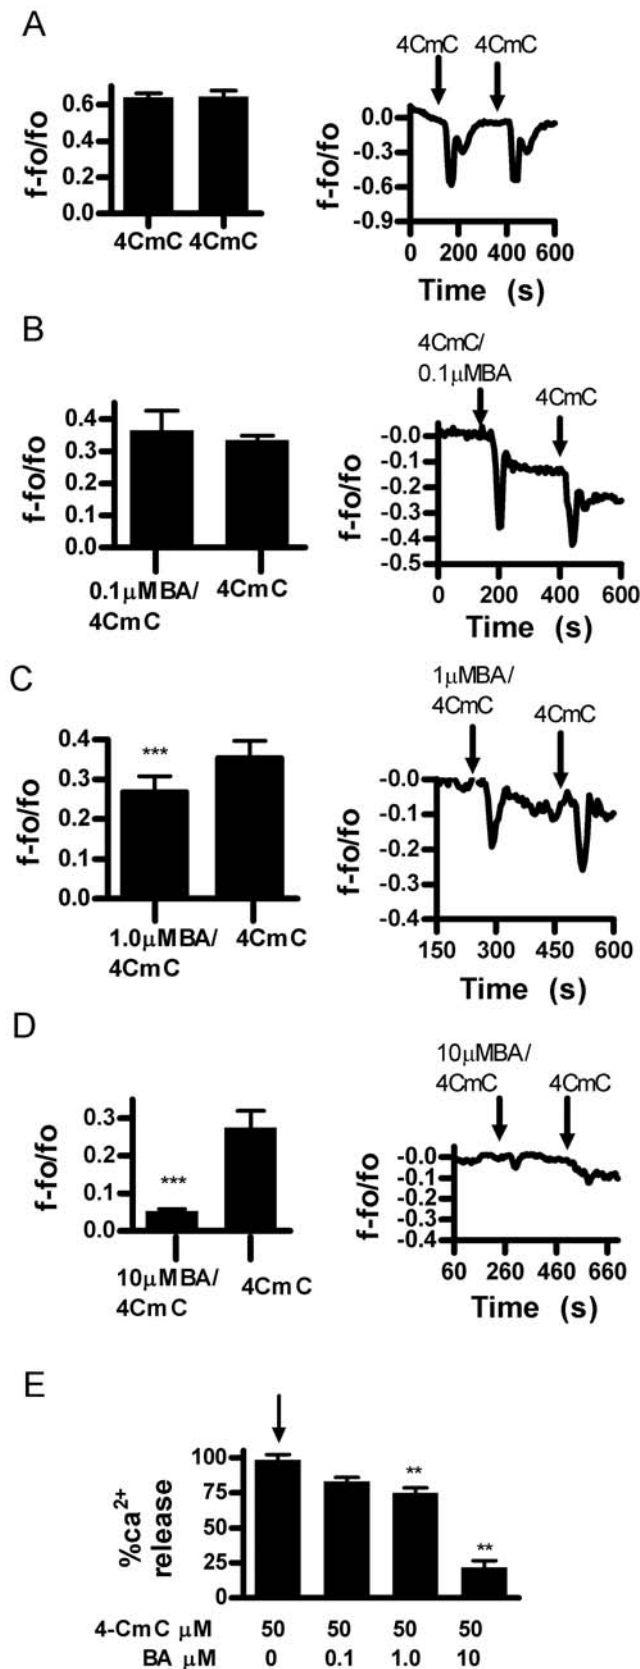

**Figure 4. Boric acid inhibits  $\text{Ca}^{2+}$  release in response to ryanodine receptor agonist 4-CmC (50  $\mu\text{M}$ ) in DU-145 cells.** A. Consecutive applications of 4-CmC did not alter the calcium release response ( $n=6$ , NS). B. 0.1  $\mu\text{M}$  BA did not inhibit  $\text{Ca}^{2+}$  release. C. 1.0  $\mu\text{M}$

BA inhibited  $\text{Ca}^{2+}$  release ( $n=6$ ,  $*p<0.05$ ). D. 10  $\mu\text{M}$  BA inhibited  $\text{Ca}^{2+}$  release ( $n=6$ ,  $***p=0.0005$ ). E. Combined data analysis showing a dose dependent  $\text{Ca}^{2+}$  release response ( $n=6$  per concentration ( $**p<0.01$ )). doi:10.1371/journal.pone.0006009.g004

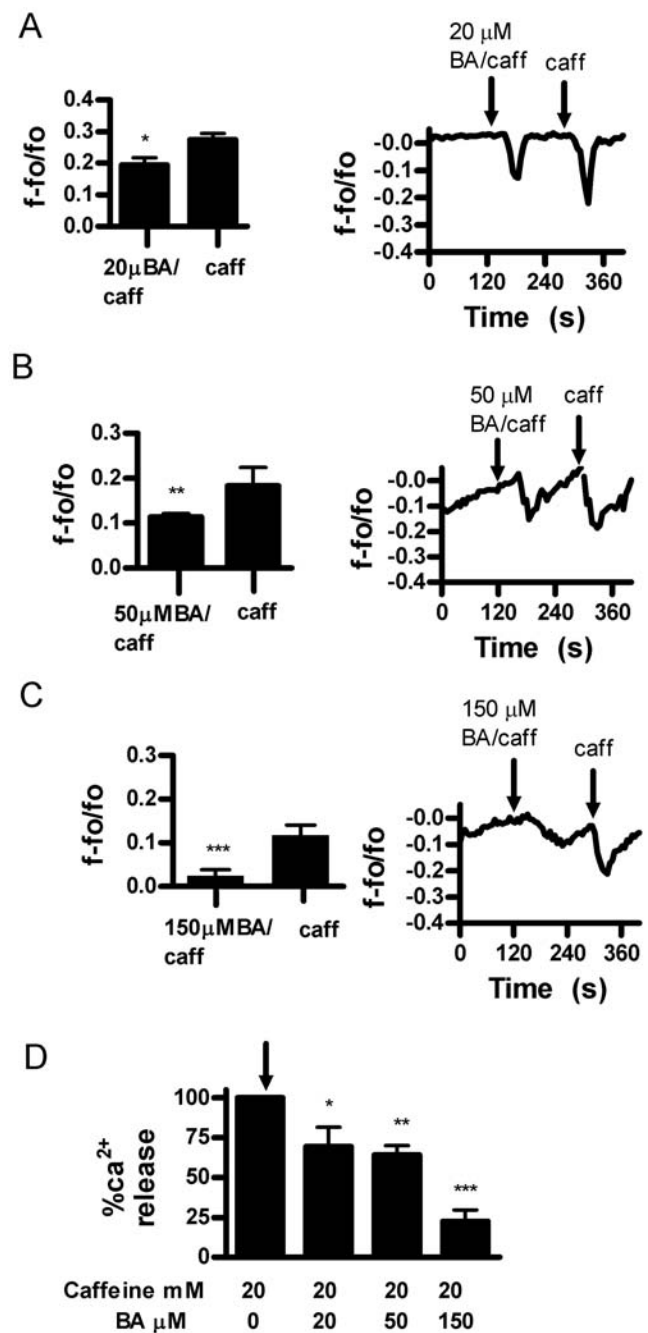

**Figure 5. Boric acid inhibition of caffeine (20 mM) stimulated  $\text{Ca}^{2+}$  release in LNCaP cells.** A. 20  $\mu\text{M}$  BA inhibition of calcium release ( $n=6$ ,  $*p=0.0226$ ). B. 50  $\mu\text{M}$  BA inhibition of  $\text{Ca}^{2+}$  release ( $n=6$ ,  $**p=0.0019$ ). C. 150  $\mu\text{M}$  BA inhibition of caffeine induced  $\text{Ca}^{2+}$  release ( $n=6$ ,  $***p<0.0001$ ). D. Combined data showing concentration dependent inhibition of caffeine stimulated release ( $n=6$ ,  $**p<0.01$ ). doi:10.1371/journal.pone.0006009.g005

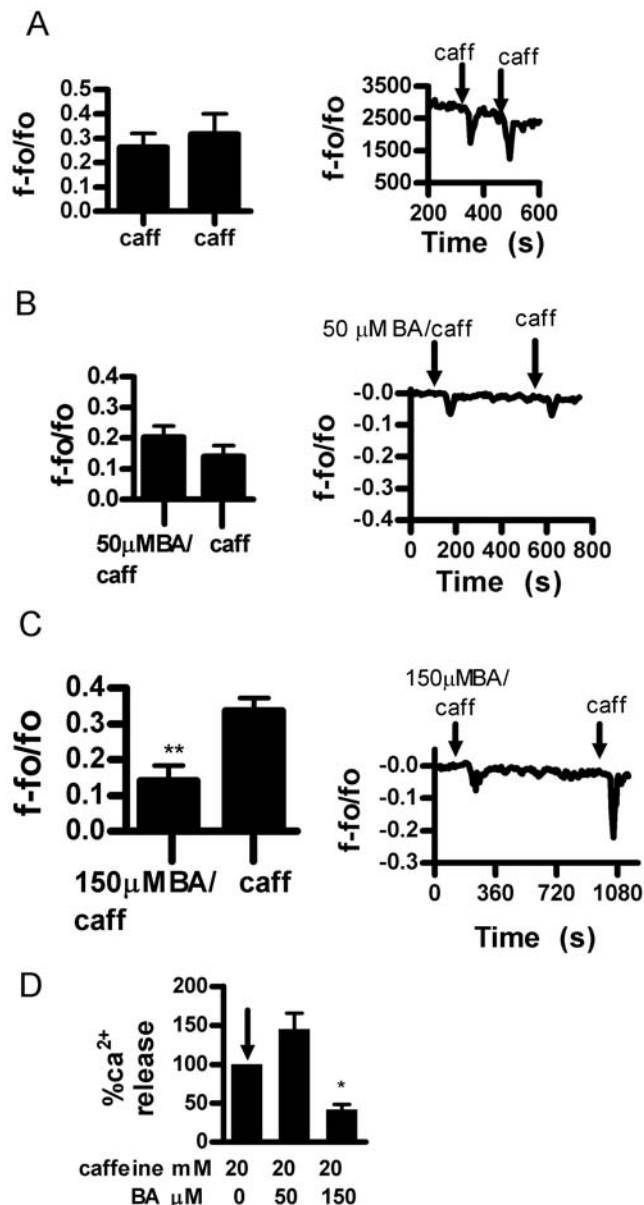

**Figure 6. Boric acid inhibition of caffeine (20 mM) stimulated  $\text{Ca}^{2+}$  release in PWR1E non-tumor cells.** A. Consecutive caffeine applications in PWR1E prostate cell. (n=6, NS). B. 50  $\mu\text{M}$  BA and caffeine induced  $\text{Ca}^{2+}$  release shows no inhibition (n=6, NS). C. 150  $\mu\text{M}$  BA inhibited caffeine induced  $\text{Ca}^{2+}$  release (n=6, \*\*p=0.0029). D. Combined data showing no dose response and inhibition only at 150  $\mu\text{M}$  (n=6, \*p<0.05).

doi:10.1371/journal.pone.0006009.g006

responsive to 4CmC treatment. RyR isoforms 1 and 2, but not 3 are known to be activated by 4CmC in some cell lines [41]. It is possible that cell line differences were due to differences in RyR isoforms or their expression. LNCaP cell lines have been shown to express RyR 1 and 2, but not 3 [42]. We were unable to locate studies in the literature that identified RyR isoforms in DU-145 or PWR1E cells in any prostate cell line.

Renal function tests have shown BA is reabsorbed by the kidney in non-pregnant and pregnant women [43]. The discovery of an electrogenic, voltage-regulated bicarbonate sodium-coupled borate co-transporter (NaBC1) in rat kidney tubules may explain this

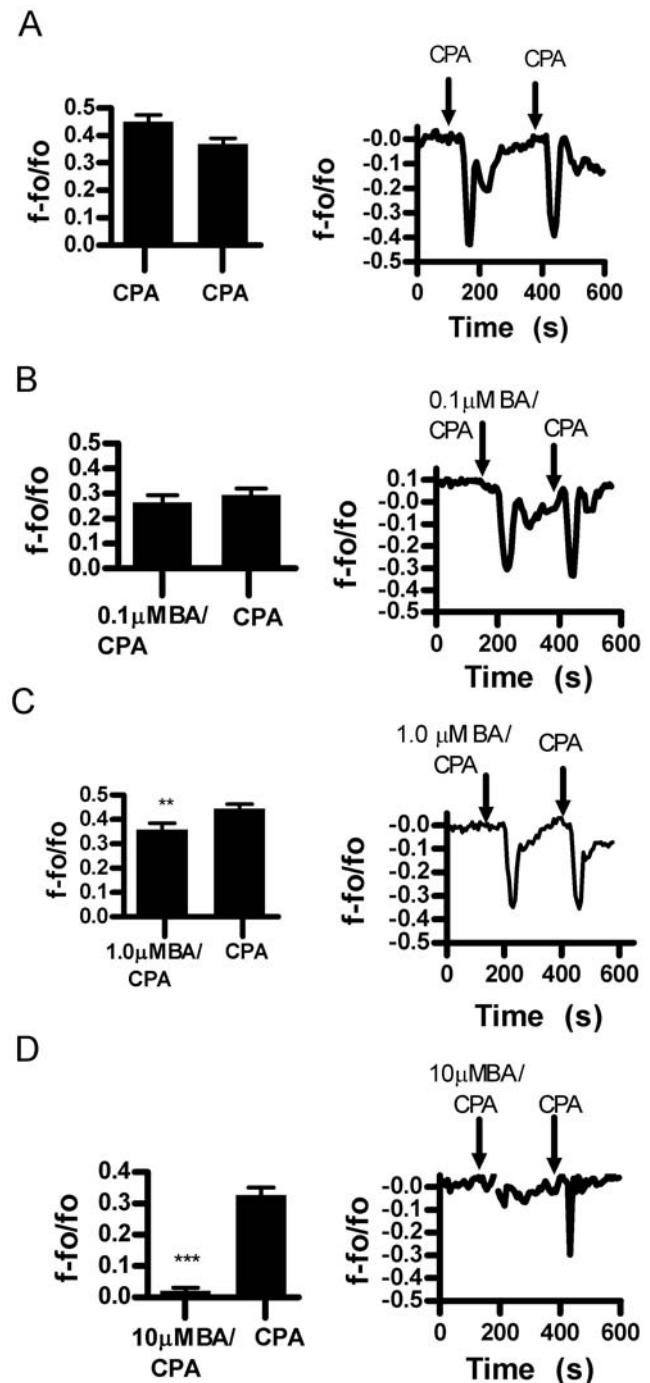

**Figure 7. Boric acid inhibits CPA (10  $\mu\text{M}$ ) induced  $\text{Ca}^{2+}$  release from the ER in DU-145 cells.** Cells were tested with CPA+BA followed by CPA. A. Consecutive applications of CPA did not alter  $\text{Ca}^{2+}$  release (n=6, NS). B. 0.1  $\mu\text{M}$  M BA did not inhibit CPA stimulated  $\text{Ca}^{2+}$  release (n=6, NS). C. 1.0  $\mu\text{M}$  BA inhibited CPA stimulated  $\text{Ca}^{2+}$  release (n=6, \*\*p=0.0037). D. 10  $\mu\text{M}$  BA inhibited CPA stimulated  $\text{Ca}^{2+}$  release (n=6, \*\*\*p<0.0001).

doi:10.1371/journal.pone.0006009.g007

observation, but it has not yet been confirmed by another laboratory. NaBC1 expression induced proliferation in HEK and Hela cells by activation of the MAPK pathway 16 hours post-treatment [13]. It is unknown at this time whether NaBC1 is expressed in prostate tumor and non-tumor cell lines, but

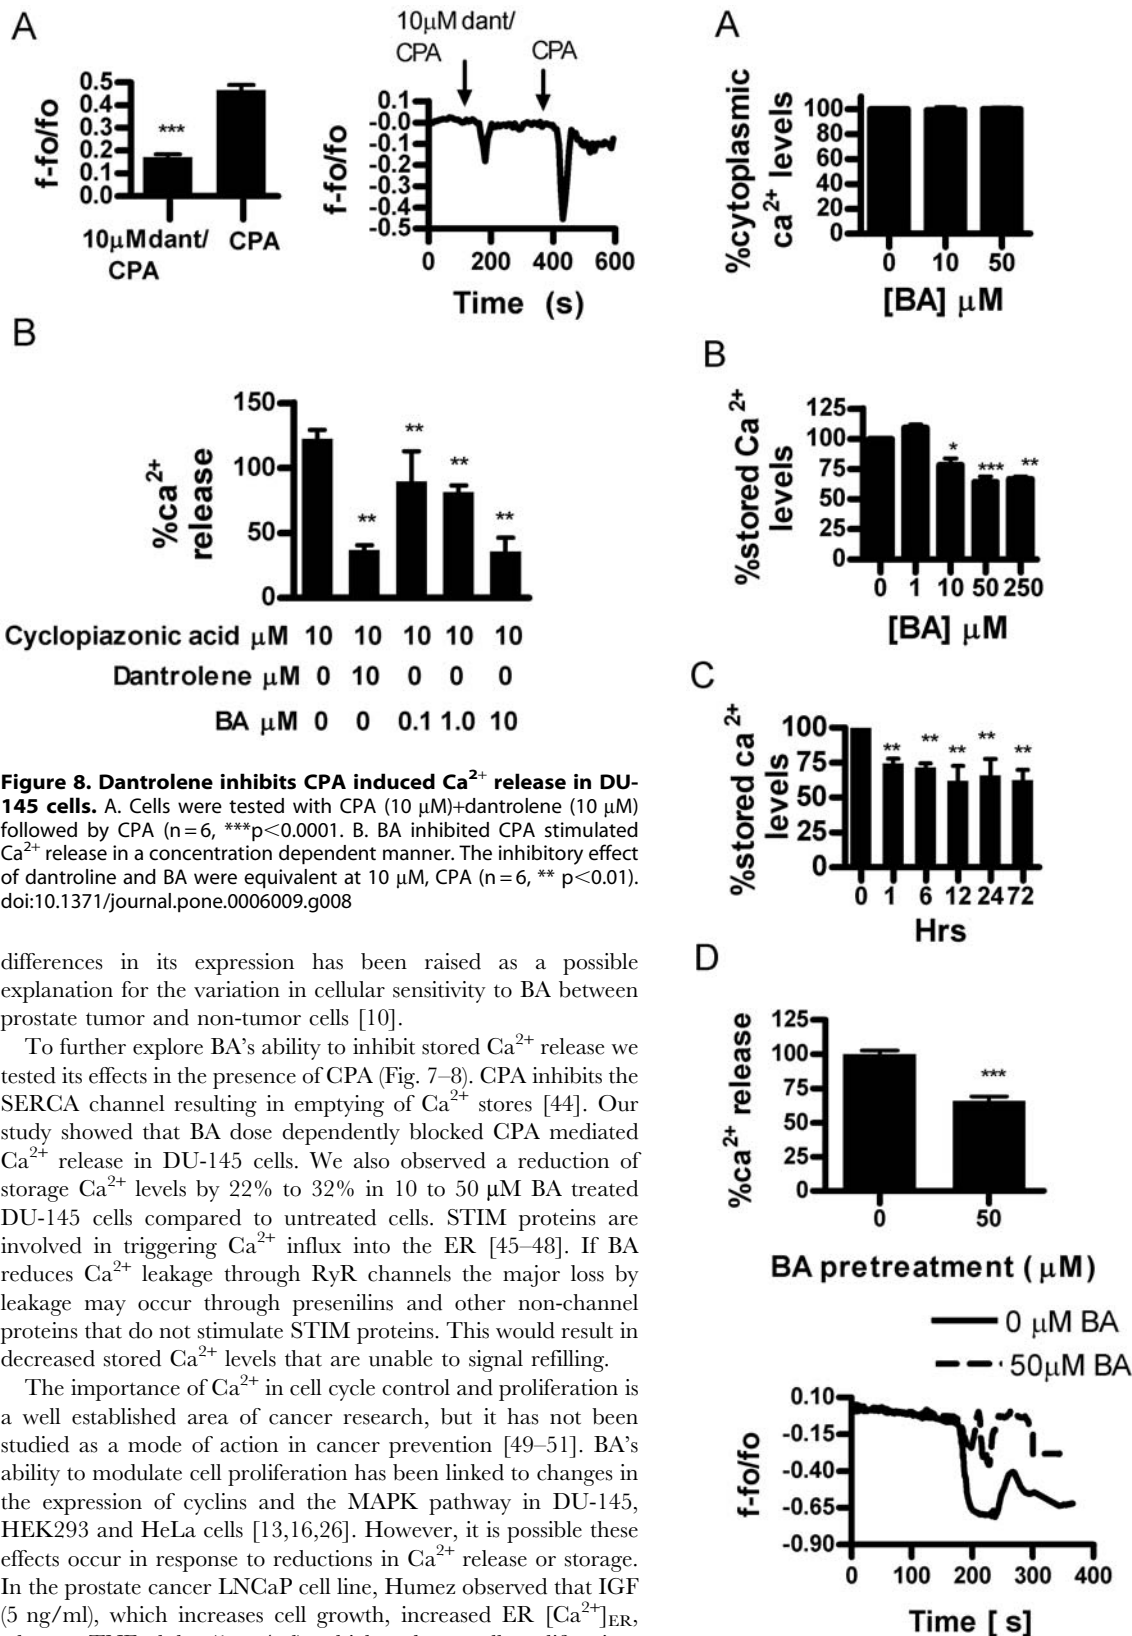

**Figure 8. Dantrolene inhibits CPA induced  $\text{Ca}^{2+}$  release in DU-145 cells.** A. Cells were tested with CPA (10  $\mu\text{M}$ )+dantrolene (10  $\mu\text{M}$ ) followed by CPA ( $n=6$ , \*\*\* $p<0.0001$ ). B. BA inhibited CPA stimulated  $\text{Ca}^{2+}$  release in a concentration dependent manner. The inhibitory effect of dantrolene and BA were equivalent at 10  $\mu\text{M}$ , CPA ( $n=6$ , \*\*  $p<0.01$ ). doi:10.1371/journal.pone.0006009.g008

differences in its expression has been raised as a possible explanation for the variation in cellular sensitivity to BA between prostate tumor and non-tumor cells [10].

To further explore BA's ability to inhibit stored  $\text{Ca}^{2+}$  release we tested its effects in the presence of CPA (Fig. 7–8). CPA inhibits the SERCA channel resulting in emptying of  $\text{Ca}^{2+}$  stores [44]. Our study showed that BA dose dependently blocked CPA mediated  $\text{Ca}^{2+}$  release in DU-145 cells. We also observed a reduction of storage  $\text{Ca}^{2+}$  levels by 22% to 32% in 10 to 50  $\mu\text{M}$  BA treated DU-145 cells compared to untreated cells. STIM proteins are involved in triggering  $\text{Ca}^{2+}$  influx into the ER [45–48]. If BA reduces  $\text{Ca}^{2+}$  leakage through RyR channels the major loss by leakage may occur through presenilins and other non-channel proteins that do not stimulate STIM proteins. This would result in decreased stored  $\text{Ca}^{2+}$  levels that are unable to signal refilling.

The importance of  $\text{Ca}^{2+}$  in cell cycle control and proliferation is a well established area of cancer research, but it has not been studied as a mode of action in cancer prevention [49–51]. BA's ability to modulate cell proliferation has been linked to changes in the expression of cyclins and the MAPK pathway in DU-145, HEK293 and HeLa cells [13,16,26]. However, it is possible these effects occur in response to reductions in  $\text{Ca}^{2+}$  release or storage. In the prostate cancer LNCaP cell line, Humez observed that IGF (5 ng/ml), which increases cell growth, increased ER [ $\text{Ca}^{2+}$ ]<sub>ER</sub>, whereas TNF alpha (1 ng/ml), which reduces cell proliferation, reduced [ $\text{Ca}^{2+}$ ]<sub>ER</sub> [52].

In conclusion, BA has previously been reported to reduce the risk of prostate cancer in humans and reduce tumor growth and prostate cancer cell proliferation, migration, and invasion. Our results demonstrate that physiological levels of BA inhibit agonist

**Figure 9. Boric acid treatment lowers luminal storage [ $\text{Ca}^{2+}$ ]<sub>st</sub> but has no effect on cytoplasmic [ $\text{Ca}^{2+}$ ]<sub>cyt</sub> in DU-145 cells.** A. Relative [ $\text{Ca}^{2+}$ ]<sub>cyt</sub> following exposure to 0, 10 and 50  $\mu\text{M}$  BA for 24 hrs ( $n=5$ , NS). B. [ $\text{Ca}^{2+}$ ]<sub>st</sub> as percent of 0 treatment in DU-145 cells treated with 0–250  $\mu\text{M}$  BA for 24 hrs. Boric acid [10–50  $\mu\text{M}$ ] reduced ER calcium

levels by more than 22%–32% compared to untreated cells ( $n=5$ ,  $p<0.05$ ,  $**p<0.01$ ,  $***p<0.001$ ). C. Reduction of  $[\text{Ca}^{2+}]_{\text{st}}$  in DU145 cells treated with 50  $\mu\text{M}$  BA from 1–72 hours ( $n=5$ ,  $**p<0.01$ ). D. Confocal measurement showed pretreatment of cells with BA for 24 hrs lowered thapsigargin stimulated  $\text{Ca}^{2+}$  release compared to untreated cells ( $n=6$ ,  $***p<0.0001$ ). doi:10.1371/journal.pone.0006009.g009

stimulated release of stored  $\text{Ca}^{2+}$  in a dose dependent manner and lower stored  $\text{Ca}^{2+}$  storage levels. This suggests that BA's ability to dampen  $\text{Ca}^{2+}$  signaling in cancer cells underlies its ability to reduce clinical cancer risk.

## References

- Berridge M, Bootman M, Roderick H (2003) Calcium signaling: dynamics, homeostasis and remodeling. *Mol Cell Bio* 4: 517–529.
- Golovina V, Mordecai B (1997) Spatially and functionally distinct  $\text{Ca}^{2+}$  stores in sarcoplasmic and endoplasmic reticulum. *Science* 275: 1643–1648.
- Golovina VA (1999) Cell proliferation is associated with enhanced capacitative  $\text{Ca}^{2+}$  entry in human arterial myocytes. *Am J Physiol Cell Physiol* 277: C343–349.
- Szabdkai G, Muchen M (2007) Mitochondria: The hub of cellular  $\text{Ca}^{2+}$  signaling. *Physiology* 23: 84–94.
- Watson W, Facchina S, Grimaldi M, Verma A (2003) Sarco-endoplasmic reticulum  $\text{Ca}^{2+}$  ATPase (SERCA) inhibitors identify a novel calcium pool in the central nervous system. *J Neurochem* 87: 30–43.
- Corey E (2003) Boron. *Chemical and Engineering News* 81: 40.
- Woods W (1994) An introduction to boron: history, sources, uses, and chemistry. *Environ Health Perspect* 102: 5–11.
- Chen X, Schauder S, Potier N, Dorselaer A, Pelczar I, et al. (2002) Structural identification of a bacterial quorum sensing signal containing boron. *Nature* 415: 545–549.
- O'Neill MA, W D, Kates K, Pellerin P, Doco T, Darvill AG, Albersheim P (1996) Rhamnogalacturonan-II, a pectic polysaccharide in the walls of growing plant cell, forms a dimer that is covalently cross-linked by a borate ester. *J Biol Chem* 271: 22923–22930.
- Takano J, Miwa K, Fujiwara T (2008) Boron transport mechanisms: collaboration of channels and transporters. *Trends in Plant Science* 13: 451–457.
- Sutton T, B U, Hayes J, Collins NC, Shi B-J, Schnurbusch T, Hay A, Mayo G, Pallotta M, Tester M, Langridge P (2007) Boron toxicity tolerance in barley arising from efflux transporter amplification. *Science* 318: 1446–1449.
- Tankano J, Kyoko Miwa K, Yuan L, von Wiren N, Fujiwara T (2005) Endocytosis and degradation of BOR1, a boron transporter of Arabidopsis thaliana, regulated by boron availability. *Proc Natl Acad Sci U S A* 102: 12276–12281.
- Park M, L Q, Shcheynikov N, Zeng W, Mualim S (2004) NaBC1 is a ubiquitous electrogenic  $\text{Na}^{+}$ -coupled borate transporter essential for cellular boron homeostasis and cell growth and proliferation. *Mol Cell Bio* 16: 331–341.
- Eckhart C (1998) Boron stimulates embryonic trout growth. *J Nutr* 128: 2488–2493.
- Rowe R, Eckhart C (1999) Boron is required for zebrafish embryogenesis. *Journal of Experimental Biology* 202: 1649–1654.
- Barranco W, Eckhart C (2004) Boric acid inhibits prostate cancer cell proliferation. *Cancer Letters* 216: 21–29.
- Barr R, Clarke R, Clarke R, Venturelli J, Norman G, et al. (1993) Regulation of lithium and boron levels in normal human blood: Environmental and genetic considerations. *J Lab Clin Med* 121: 614–619.
- IPCS (1998) Boron. *Environmental Health Criteria WHO*. pp 61–65.
- Barranco W, Hudak P, Eckhart C (2007) Evaluation of ecological and in vitro effects of boron on prostate cancer risk. *Cancer Causes Control* 18: 583–584.
- Barranco W, Hudak P, Eckhart C (2007) Erratum: Evaluation of ecological and in vitro effects of boron on prostate cancer risk. *Publisher Erratum Figure 1. Cancer Causes Control* 18: 583–584.
- Mahabir S, Spitz M, Barrera S, Dong Y, Eastham C, et al. (2008) Dietary boron and hormone replacement therapy as risk factors for lung cancer in women. *Am J Epidemiol* 167: 1070–1080.
- Cui Y, Winton M, Zhang Z-F, Rainey C, Marshall J, et al. (2004) Dietary boron intake and prostate cancer risk. *Oncology Reports* 11: 887–892.
- Gonzalez A, Peters U, Lampe J, White E (2007) Boron intake and prostate cancer risk. *Cancer Causes Control* 18: 1131–1140.
- Hunt C, Meacham S (2001) Aluminum, boron, calcium, copper, iron, magnesium, manganese, molybdenum, phosphorus, potassium, sodium, and zinc: Concentrations in common Western foods and estimated daily intakes by infants; toddlers; and male and female adolescents, adults, and seniors in the United States. *Journal of the American Dietetic Association* 101: 1058–1060.
- Gallardo-Williams M, Chapin R, King P, Moser G, Goldsworthy T, et al. (2004) Boron supplementation inhibits the growth and local expression of IGF-1 in human prostate adenocarcinoma (LNCaP) tumors in nude mice. *Tox Path* 32: 73–78.
- Barranco W, Eckhart C (2006) Cellular changes in boric acid-treated DU-145 prostate cancer cells. *Brit J Cancer* 94: 884–890.
- Barranco W, Kim D, Stella S, Eckhart C (2008) Boric Acid inhibits stored  $\text{Ca}^{2+}$  release in DU-145 prostate cancer cells. *Cell Bio Tox*;10.1007/s10565-008-9085-7.
- Kim D, Faull K, Norris A, Eckhart C (2004) B orate-nucleotide complex formation depends on charge and phosphorylation state. *J Mass Spectrometry* 39: 743–751.
- Kim D, Marbois B, Faull K, Eckhart C (2003) Esterification of borate with  $\text{NAD}^{+}$  and  $\text{NADH}$  as studied by electrospray ionization mass spectrometry and  $^{11}\text{B}$  NMR spectroscopy. *J Mass Spectrometry* 38: 632–640.
- Kim D, Que Hee S, Norris A, Faull K, Eckhart C (2006) Boric acid inhibits ADP-ribosyl cyclase non-competitively. *J Chromatography A* 1115: 246–252.
- Chameau P, Vrede Y, Fossier P, Baux G (2001) Ryanodine-, IP<sub>3</sub>- and NAADP-dependent calcium stores control acetylcholine release. *European Journal of Physiology* 443: 289–296.
- Minta A, Kao J, Tsien R (1989) Fluorescent indicators for cytosolic calcium based rhodamine and fluorescein chromophores. *J Bio Chem* 264: 8171–8178.
- Mironov S, Ivannikov M, Johansson M (2005)  $[\text{Ca}^{2+}]_i$  Signaling between mitochondria and endoplasmic reticulum in neuron is regulated by microtubules. *J Bio Chem* 280: 715–721.
- Bennett A, Rowe R, Soch N, Eckhart C (1999) Boron Stimulates Yeast (*Saccharomyces cerevisiae*) Growth. *J Nutr* 129: 2236–2238.
- Kong H, Jones PP, Koon A, Zhang L, Duff HJ, et al. (2008) Caffeine induces  $\text{Ca}^{2+}$  release by reducing the threshold for luminal  $\text{Ca}^{2+}$  activation of the ryanodine receptor. *Biochemistry Journal* 414: 441–452.
- Morita K, Kitayama T, Kitayama S, Hohi T (2006) Cyclic ADP-ribose requires FK506-binding protein to regulate intracellular  $\text{Ca}^{2+}$  dynamics and catecholamine release in acetylcholine stimulated bovine adrenal chromaffin cells. *Journal of Pharmacological Sciences*.
- Kaufman A, Kraft B, Michalek-Sauberer A, Weigl L (2008) Novel ryanodine receptor mutation that may cause malignant hyperthermia. *Anesthesiology* 109: 457–464.
- Xia T, Kovochich M, Brant J, Hotze M, Sempf J, et al. (2006) Comparison of the abilities of ambient and manufactured nanoparticles to induce cellular toxicity according to an oxidative stress paradigm. *Nano Letters* 6: 1794–1807.
- Li N, Lin P, Danielpour D, Pan Z, Ma J (2008) Overexpression of bax induces down-regulation of store operated calcium entry in prostate cancer cells. *Journal of Cellular Physiology* 216: 172–179.
- Matsumoto H, Takeuchi R, Arai T, Sato N, Akimoto Y, et al. (2003) Cyclopiazonic acid discharges intracellular  $\text{Ca}^{2+}$  stores and stimulates  $\text{Ca}^{2+}$  influx in cultured human gingival fibroblasts. *Journal of Oral Science* 45: 139–144.
- Fessenden J, Feng W, Pessah I, Allen P (2006) Amino acid residue Gln4020 and Lys4021 of the ryanodine receptor type 1 are required for activation by 4-chloro-m-cresol. *J Biol Chem* 281: 21022–21031.
- Mariot P, Prevarskaya N, Roudbaraki M, Le Bourhis X, Van Coppenolle F, et al. (2000) Evidence of functional ryanodine receptor involved in apoptosis of prostate cancer (LNCaP) cells. *The Prostate* 43: 205–214.
- Pahl MV, C BD, Strong PL, Murray FJ, Vaziri ND (2001) The effect of pregnancy on renal clearance of boron in humans: a study based on normal dietary intake of boron. *Toxicological Sciences* 60: 252–256.
- Wayman C, McFadzean I, Gibson A, Tucker J (1996) Two distinct membrane currents activated by cyclopiazonic acid-induced calcium store depletion in single smooth muscle cells of the mouse anococcygeus. *British Journal of Pharmacology* 117: 566–572.
- Brandman O, Liou J, Park W, Meyer T (2007) STIM2 is a feedback regulator that stabilizes basal cytosolic and endoplasmic reticulum  $\text{Ca}^{2+}$  levels. *Cell* 131: 1327–1339.
- Liou J, Kim M, Heo W, Myers J, Ferrell J, et al. (2005) STIM is a  $\text{Ca}^{2+}$  sensor essential for  $\text{Ca}^{2+}$ -store-depletion-triggered  $\text{Ca}^{2+}$  influx. *Current Bio*. pp 1235–1241.

## Acknowledgments

We thank Mike Kovochich for his help with flow cytometry experiments.

## Author Contributions

Conceived and designed the experiments: KH CDE. Performed the experiments: KH SK. Analyzed the data: KH CDE. Contributed reagents/materials/analysis tools: SLSJ. Wrote the paper: KH CDE.

47. Lopez J, Jardin I, Bobe R, Pariente J, Enouf J, et al. (2008) STIM1 regulates acidic  $\text{Ca}^{2+}$  store refilling by interaction with SERCA3 in human platelets. *Biochem Pharm* 75: 2157–2164.
48. Tu H, Nelson O, Bezprozvanny A, Wang Z, Lee S-F, et al. (2006) Presenilins form ER  $\text{Ca}^{2+}$  leak channels, a function disrupted by familial Alzheimer's disease-linked mutations. *Cell* 126: 981–993.
49. Whitfield J (1995) *Calcium in Cell Cycles and Cancer*. Boca Raton Florida: CRC Press. pp 1–214.
50. Short AD, Bian J, Ghosh TK, Waldron RT, Rybak SL (1993) Intracellular  $\text{Ca}^{2+}$  pool content is linked to control of cell growth. *Proc Natl Acad Sci U S A* 90: 4986–4990.
51. Legrand G, Humez S, Slomianny C, Dewailly E, Abeele FV, et al. (2001)  $\text{Ca}^{2+}$  Pools and Cell Growth. Evidence for sarcoendoplasmic  $\text{Ca}^{2+}$ -ATPases 2B involvement in human prostate cancer cell growth control. *J Biol Chem* 276: 47608–47614.
52. Humez S, Legrand G, Vanden-Abeele F, Monet M, Marchetti P, et al. (2004) Role of endoplasmic reticulum calcium content in prostate cancer cell growth regulation by IGF and TNF $\alpha$ . *Journal of Cellular Physiology* 201: 201–213.
